# Supplementary material
Source: MDPI journal article supplement (https://www.mdpi.com/2036-7481/13/1/4)
Supplement: s1 [file s1]

|                  |    |   |    |               |     |   |   |   |   |   |   |   |   |   |   |   |   |   |   |   |   |   |   |   |   |   |
|------------------|----|---|----|---------------|-----|---|---|---|---|---|---|---|---|---|---|---|---|---|---|---|---|---|---|---|---|---|
| <i>S. aureus</i> | 25 | F | 3  | Blood         | PW  | S | S | S | S |   | R | S | S | S | S | S | S | S | S | S | S | S | S | S | S | S |
| <i>S. aureus</i> | 26 | M |    | Swab          | ICU | R | R | R | R | R | R | R | R | S | S | S | S | S | S | S | S | S | S | S | S | R |
| <i>S. aureus</i> | 27 | F | 47 | Wound swab    | FMW | S | R | R | R | R | R | R | R | S | S | S | S | S | S | S | S | R | S | S | S | S |
| <i>S. aureus</i> | 28 | M | 4  | Wound swab    | PSW | S | S | S | S |   | R | S | S | S | R | S | S | S | S | S | S | S | S | S | S | S |
| <i>S. aureus</i> | 29 | F |    | Blood         | FMW | S | S | S | S |   | R | S | S | S | R | S | S | S | S | S | S | S | S | S | R |   |
| <i>S. aureus</i> | 30 | F |    | Swab          | FSW | R | R | R | R | R | R | R | R | S | S | S | S | S | S | S | S | S | S | S | S | S |
| <i>S. aureus</i> | 31 | F | 35 | Wound swab    | OPD | S | S | S | S |   | R | S | S | S | S | S | S | S | S | S | S | S | S | S | S | S |
| <i>S. aureus</i> | 32 | M | 25 | Sputum        | ICU | S | S | S | S |   | R | S | S | S | S | S | R | R | R | S | S | S | S | S | S | S |
| <i>S. aureus</i> | 33 |   |    | Wound         | ER  | S | S |   |   |   |   | S |   | S | S | S | S | S | S | S |   | S | S | S | S | S |
| <i>S. aureus</i> | 34 | M | 73 | Nasal, throat | MMW | S | R | R | R | R | R | R | R | S | S | S | S | S | S | S | S | S | S | S | S | S |
| <i>S. aureus</i> | 35 | M | 31 | Wound         | MMW | S | R | R | R | R | R | R | R | S | R | S | S | R | S | S | S | R | S | S | R |   |
| <i>S. aureus</i> | 36 | M | 44 | Wound         | MSW | S | S | R | R | R | R | R | R | S | S | S | S | S | S | S | S | S | S | S | S | S |
| <i>S. aureus</i> | 37 | M | 76 | Urine         | LAB | S | R | R | R | R | R | R | R | S | S | S | S | S | R | S | S | S | S | S | S | S |
| <i>S. aureus</i> | 38 | F | 69 | Nasal, throat | ER  | S | R | R | R | R | R | R | R | S | S | S | S | S | S | S | S | S | S | S | S | S |
| <i>S. aureus</i> | 39 | F | 56 | Wound         |     | S | R | R | R | R | R | R | R | S | R | S | S | S | R | S | S | S | S | S | R |   |
| <i>S. aureus</i> | 40 | F | 56 | Wound         |     | S | R | R | R | R | R | R | R | S | R | S | S | S | R | S | S | S | S | S | R |   |
| <i>S. aureus</i> | 41 | F | 43 | Wound         |     | S | S | S | S |   | R | S | S | S | R | S | S | S | S | S | S | S | S | S | S | S |
| <i>S. aureus</i> | 42 | M | 30 | AKU/AMR       |     | R | S | S | S |   | R | S | S | S | S | S | S | S | S | S | S | S | S | S | S | S |
| <i>S. aureus</i> | 43 | M | 64 | AE/AN         |     | R | S | S | S |   | R | S | S | S | S | S | S | S | S | S | S | S | S | S | S | S |
| <i>S. aureus</i> | 44 | F | 60 | Nasal throat  | ER  | S | R | R | R |   | R | R | R | S | S | S | S | S | R |   | S | S | S | R | S | S |
| <i>S. aureus</i> | 45 | F | 24 | Wound         | FSW | S | S | S | S |   | R | S | S | S | R | S | S | R | S | S | S | R | S | S | S | S |
| <i>S. aureus</i> | 46 | F | 62 | Wound         | FSW | S | S | S | S |   | R | S | S | S | S | S | S | R | I | S | S | S | S | S | S | S |
| <i>S. aureus</i> | 47 | F | 31 | Wound         |     | S | R | R | R | R | R | R | R | S | S | S | S | S | S | S | S | S | S | S | S | S |
| <i>S. aureus</i> | 48 | F | 50 | Urine         | FMW | S | S | S | S |   | R | S | S | S | S | S | S | S | S | S | S | S | S | S | S | S |
| <i>S. aureus</i> | 49 | M | 83 | Nasal swab    | MMW | R | R | R | R |   | R | R | R | S | S | S | S | S | R | S | S | S | S | S | S | S |
| <i>S. aureus</i> | 50 | M | 45 | Wound         | MSW | S | S | S | S |   | R | S | S | S | R | R | R | R | S | R | R | S | S | S | R |   |

|                  |    |   |     |              |     |   |   |   |   |   |   |   |   |   |   |   |   |   |   |   |   |   |   |   |   |
|------------------|----|---|-----|--------------|-----|---|---|---|---|---|---|---|---|---|---|---|---|---|---|---|---|---|---|---|---|
| <i>S. aureus</i> | 51 | M | 35  | AE/AN        | ICU | S | S | S | S | R | S | S | S | S | S | S | S | S | S | S | S | S | S | S | S |
| <i>S. aureus</i> | 52 | M | 30  | Swab         | FMW | S | R | R | R | R | R | R | S | S | S | S | S | S | S | S | S | R | S | S | S |
| <i>S. aureus</i> | 53 | M | 45  |              | ER  | S | S | I | S | R | S | S | S | S | S | R | R | S | S | S | S | S | S | S | S |
| <i>S. aureus</i> | 54 | M | 1   | Wound        | LAB | S | S | S | S | R | S | S | S | S | S | R | S | S | S | S | S | S | S | S | S |
| <i>S. aureus</i> | 55 | M | 75  | Blood        | ICU | R | R | R | R | R | R | R | S | S | S | S | R | R | R | S | S | S | R | S | S |
| <i>S. aureus</i> | 56 | M | 1MO | RT EYE       | PSW | R | R | R | R | R | R | R | S | S | S | S | S | R | S | S | S | S | S | S | S |
| <i>S. aureus</i> | 57 | M | 51  | Nasal throat | ER  | S | R | R | R | R | R | R | S | S | S | S | S | R | S | S | S | S | S | S | S |
| <i>S. aureus</i> | 58 | M | 38  | Wound        | FMW | S | R | R | R | R | R | R | S | S | S | S | S | R | S | S | S | S | S | S | S |
| <i>S. aureus</i> | 59 | M | 57  | Wound        | FSW | S | S | S | S | R | S | S | S | R | S | S | S | S | S | S | S | S | S | S | S |
| <i>S. aureus</i> | 60 | M | 1MO | Eye swab     | PSW | R | R | R | R | R | R | R | S | S | S | S | S | R | S | S | S | S | S | S | S |
| <i>S. aureus</i> | 61 | M | 74  | Blood        | MMW | S | S | S | S | R | R | S | S | S | S | S | R | S | S | S | S | S | S | S | S |
| <i>S. aureus</i> | 62 | F | 57  | Wound        | FSW | S | S | S | S | R | S | S | S | R | S | S | S | S | S | S | S | S | S | S | S |
| <i>S. aureus</i> | 63 | M | 83  | Nasal throat | ER  | R | R | R | R | R | R | R | S | S | S | S | S | R | S | S | S | S | S | S | S |
| <i>S. aureus</i> | 64 | M | 89  |              | MMW | S | R | R | R | R | R | R | S | R | S | S | R | R | S | S | S | R | R | S | S |
| <i>S. aureus</i> | 65 | F | 25  | Nasal throat | FMW | S | R | R | R | R | R | R | S | S | S | S | S | S | S | S | S | S | S | S | S |
| <i>S. aureus</i> | 66 | M | 74  | Nasal throat | ICU | R | R | R | R | R | R | R | S | S | S | S | S | R | S | S | S | S | S | S | S |
| <i>S. aureus</i> | 67 | M | 89  | Urine        | MMW | S | R | R | R | R | R | R | S | S | S | S | R | R | S | S | S | R | R | S | S |
| <i>S. aureus</i> | 68 | F | 30  | AE/AN        | FMW | S | R | R | R | R | R | R | S | S | S | S | S | S | S | S | R | S | S | S | S |
| <i>S. aureus</i> | 69 | M | 83  | Blood        | ER  | R | R | R | R | R | R | S | S | S | S | S | R | S | S | S | S | S | S | S | S |
| <i>S. aureus</i> | 70 | F | 25  | Nasal throat | FMW | S | R | R | R | R | R | R | S | S | S | S | S | R | S | S | S | S | S | S | S |
| <i>S. aureus</i> | 71 | M | 30  | Blood        | COW | I | R | R | R | R | R | R | S | S | S | S | R | R | R | S | R | S | S | R |   |
| <i>S. aureus</i> | 72 | F | 29  | Nasal throat | ER  | S | R | R | R | R | R | R | S | R | S | S | S | R | S | S | S | R | S | S | S |
| <i>S.aureus</i>  | 73 | M | 71  | Nasal throat | ER  | S | R | R | R | X | R | R | S | S | S | S | S | R | S | S | S | S | S | S | S |
| <i>S.aureus</i>  | 74 | M | 61  | Axilla       | ICU | S | R | R | R | R | R | R | S | S | S | S | S | S | S | S | S | S | S | S | S |
| <i>S.aureus</i>  | 75 | M | 78  | Throat       | ICU | S | R | R | R | R | R | R | S | S | S | S | S | S | S | S | S | S | S | R |   |
| <i>S.aureus</i>  | 76 | F | 63  | Blood        | FMW | S | S | X | S | X | R | R | S | S | S | S | R | R | S | S | S | R | R | S | S |

|                 |     |   |        |             |       |   |   |   |   |   |   |   |   |   |   |   |   |   |   |   |   |   |   |   |   |   |
|-----------------|-----|---|--------|-------------|-------|---|---|---|---|---|---|---|---|---|---|---|---|---|---|---|---|---|---|---|---|---|
| <i>S.aureus</i> | 77  | M | 76     | Urine       | LAB   | S | R | R | R | R | R | R | R | S | S | S | S | S | R | S | S | S | S | S | S | S |
| <i>S.aureus</i> | 78  | F | 1month | Wound       | PICU  | S | S | S | S | X | R | S | S | S | S | S | S | S | R | S | S | S | S | S | S | S |
| <i>S.aureus</i> | 79  | F | 1MONTH | Wound       | PICU  | S | S | S | S | X | R | S | S | S | S | S | S | S | R | S | S | S | S | S | S | S |
| <i>S.aureus</i> | 80  | F | 66     | Throat      | ER    | S | R | R | R | R | R | R | R | S | S | S | S | S | R | R | S | S | S | R | S | S |
| <i>S.aureus</i> | 81  | M | 26     | Wound       | DER   | S | R | R | R | R | R | R | R | S | S | S | S | S | R | S | S | S | S | R | S | S |
| <i>S.aureus</i> | 82  | F | 30     | Blood       | ICU   | S | R | R | R | X | R | R | R | S | S | S | S | S | S | S | S | S | S | R | S | S |
| <i>S.aureus</i> | 83  | F | 1MONTH | Blood       | PICU  | S | S | S | R | R | R | R | S | S | S | R | R | S | R | R | S | S | S | S | S | R |
| <i>S.aureus</i> | 84  | M | 69     | Wound       | LAB   | R | R | R | R | R | R | R | R | S | S | S | S | S | R | R | S | S | S | S | S | R |
| <i>S.aureus</i> | 85  | M | 71     | Sputum      | ICU   | S | R | R | R | R | R | R | R | S | S | S | S | S | S | R | S | S | S | S | S | S |
| <i>S.aureus</i> | 86  | F | 65     | Blood       | FMW   | S | S | S | S | S | R | S | S | S | S | S | S | S | S | S | S | S | S | S | S | S |
| <i>S.aureus</i> | 87  | M | 71     | Throat      | ICU   | S | R | R | R | R | R | R | R | S | S | S | S | S | S | R | S | S | S | S | S | S |
| <i>S.aureus</i> | 88  | M | 81     | Nasal       | ER    | S | R | R | R | R | R | R | R | S | S | S | S | S | S | S | S | S | S | S | S | S |
| <i>S.aureus</i> | 89  | M | 25     | Wound-pus   | MSW   | R | R | R | R | R | R | R | R | S | S | S | S | S | S | R | S | S | S | S | S | S |
| <i>S.aureus</i> | 90  | M | 38     | Wound       | ORTHO | R | R | R | R | R | R | S | R | S | S | S | R | R | S | S | S | S | S | S | S | R |
| <i>S.aureus</i> | 91  | M | 21     | Sputum      | ICU   | S | R | R | R | R | R | R | R | S | S | S | S | S | R | S | S | S | S | S | S | S |
| <i>S.aureus</i> | 92  |   |        | other       |       | S | S | S | S | R | R | S | S | S | S | S | S | S | R | S | S | S | S | S | S | S |
| <i>S.aureus</i> | 93  | M | 57     |             | MUW   | S | S | S | S | S | R | S | S | S | R | S | S | S | S | S | S | S | S | S | S | S |
| <i>S.aureus</i> | 94  | M | 91     | Sputum      | ICU   | S | R | R | R | R | R | R | R | R | R | S | S | S | R | S | S | S | R | S | S | S |
| <i>S.aureus</i> | 95  | M | 91     | Throat      | ICU   | S | R | R | R | R | R | R | R | S | S | R | S | S | R | S | S | S | R | S | S | S |
| <i>S.aureus</i> | 96  | M | 3      | Peritonsil  | PICU  | S | S | S | S | X | S | S | X | S | S | S | S | S | S | S | S | S | S | S | S | S |
| <i>S.aureus</i> | 97  | M | 3      | Blood-AE\AU | PICU  | S | S | S | S | X | S | S | S | S | S | S | S | S | S | S | S | S | S | S | S | S |
| <i>S.aureus</i> | 98  | M | 44     | Blood AE    | MMW   | S | S | S | S | R | R | S | S | S | S | S | S | R | I | S | S | S | S | S | S | S |
| <i>S.aureus</i> | 99  | M | 1YEAR  | Throat      | PW    | S | R | R | R | R | R | R | R | S | S | S | S | R | S | S | S | S | S | S | S | S |
| <i>S.aureus</i> | 100 | M | 3YEARS | Blood       | PW    | S | S | S | S | S | R | S | S | S | S | S | S | S | S | S | S | S | S | S | S | S |
| <i>S.aureus</i> | 101 | M | 53     |             | ER    | S | R | R | R | R | R | R | R | S | R | S | S | S | S | S | S | S | S | S | S | S |
| <i>S.aureus</i> | 102 | F | 26     | Swab        | ICU   | S | R | R | R | R | R | R | R | S | R | S | S | R | S | S | S | S | S | S | S | S |

|                 |     |   |    |          |       |   |   |   |   |   |   |   |   |   |   |   |   |   |   |   |   |   |   |   |   |   |
|-----------------|-----|---|----|----------|-------|---|---|---|---|---|---|---|---|---|---|---|---|---|---|---|---|---|---|---|---|---|
| <i>S.aureus</i> | 103 | M | 87 | Wound    | MSW   | S | S | S | S | R | S | S | S | S | S | S | S | R | R | S | S | S | S | S | S | S |
| <i>S.aureus</i> | 104 | F | 71 | Sputum   | ICU   | S | S | S | S | S | S | S | S | S | S | S | S | S | S | S | S | S | S | S | S | S |
| <i>S.aureus</i> | 105 | M | 85 | Nasal    | MMW   | S | R | R | R | R | R | R | S | S | S | S | S | I | S | S | S | R | S | S | S | S |
| <i>S.aureus</i> | 106 | M | 34 | Wound    | MMW   | R | R | R | R | R | R | R | S | R | S | S | R | S | S | S | S | R | S | S | R | R |
| <i>S.aureus</i> | 107 | M | 47 | Blood    | ICU   | S | R | R | R | R | R | R | S | S | S | S | S | I | S | S | S | R | S | S | S | S |
| <i>S.aureus</i> | 108 |   |    |          | ICU   | S | R | R | R |   | R | R | R | S | S | S | S | S | R | S | S | S | R | S | S | S |
| <i>S.aureus</i> | 109 |   |    |          | ER    | S | S | S | S | X | R | R | X | S | S | X | S | S | S | S | X | X | X | S | S | X |
| <i>S.aureus</i> | 110 |   |    |          | ER    | S | S | S | S | X | R | S | X | S | S | X | S | S | R | S | X | X | X | S | S | S |
| <i>S.aureus</i> | 111 |   |    | Wound    | ER    | S | S | S | S |   | R | R |   | S | S |   | S | R | S | R | S |   |   | S | R | S |
| <i>S.aureus</i> | 112 |   |    | urine    | Urine | S | S | S | S |   | S | S |   | S | S |   | S | S | S | S | S |   |   | S | S | S |
| <i>S.aureus</i> | 113 |   |    |          | ER    | S | S | S | S |   | R | R |   | S | S |   | S | S | S | S | S |   |   | S | S | R |
| <i>S.aureus</i> | 114 | M | 31 | Wound    | MMW   | R | R | R | R | R | R | R | R | S | S | S | S | S | R | R | S | S | S | S | S | S |
| <i>S.aureus</i> | 115 |   |    |          |       | S | S | S | S | X | R | S | S | S | S | S | S | R | S | S | S | S | S | S | S | S |
| <i>S.aureus</i> | 116 | M | 19 | Wound    | LAB   | S | S | R | S | X | R | R | R | S | R | S | S | S | R | S | S | S | R | S | S | S |
| <i>S.aureus</i> | 117 | M | 81 | Wound    | MSW   | R | R | R | R | R | R | S | S | S | S | S | R | S | S | S | S | S | S | S | S | R |
| <i>S.aureus</i> | 118 | F | 40 | Wound    | FSW   | S | R | R | R | R | R | R | R | S | S | S | S | S | R | S | S | S | S | S | S | S |
| <i>S.aureus</i> | 119 | M | 6  | Blood    | PICU  | S | R | R | R | R | R | R | R | S | S | S | S | S | R | S | S | S | S | S | S | S |
| <i>S.aureus</i> | 120 | M | 6  | Eye swab | PICU  | S | R | R | R | R | R | R | R | S | S | S | S | S | S | S | S | S | S | S | S | S |
| <i>S.aureus</i> | 121 | F | 3  | Nasal    | PICU  | S | R | R | R | R | R | R | R | S | S | S | S | S | S | S | S | S | S | S | S | S |
| <i>S.aureus</i> | 122 |   |    |          |       | S | S | S | S | X | R | S | S | S | S | S | S | R | S | S | S | S | S | S | S | S |
| <i>S.aureus</i> | 123 |   |    |          |       | S | S | S | S | X | R | S | S | S | S | S | S | S | S | S | S | S | S | S | S | S |

<sup>a</sup>Age color code: Green = Young adults and children, red = seniors. <sup>b</sup>Specimen color code: red=blood, yellow=wound swab /abscesses, orange=nasopharyngeal or throat swabs or sputum.<sup>c</sup>Ward color code: red = ICU, PICU, and Covid19 isolation zones, purple = Female, male, and pediatric surgical wards (FSW, MSW, PSW), and Emergency (ER). Blue antibiogram patterns indicate beta-lactams and cephalosporins and grey patterns indicate non-beta lactams. FOX,Xpert PCR=Screened by cefoxitin and confirmed by GeneXpert analysis. S,R<sup>d</sup>=cefoxitin S but PCR R (these two isolates warrant vertical analysis on gene expression). <sup>CA</sup>= Example of MRSA antibiogram pattern and Community acquired infection based on diagnoses within 48 hours of admission.

**Table S2**, Specimen sources and type, patient demographics and antibiogram patterns of *S.epidermidis* isolates, recovered from clinical specimens in major Ha'il Hospitals, against 21 antimicrobials.

| Isolate              | No | Gender | Age | Specimen <sup>a</sup> | Ward <sup>b</sup> | CN | IMI | FOX | Screen | CTX | AMP | P | OX | AMC | DAP | SXT | TEC | VA | CD | E | FUS | LNZ | MUP | NIT | CIP | MXF | RD | TET |
|----------------------|----|--------|-----|-----------------------|-------------------|----|-----|-----|--------|-----|-----|---|----|-----|-----|-----|-----|----|----|---|-----|-----|-----|-----|-----|-----|----|-----|
| <i>S.epidermidis</i> | 1  | M      | 63  |                       |                   | R  | S   | S   |        | S   |     | R | R  | S   | S   | S   | S   | S  | S  | R | R   | R   | S   | S   | R   | S   | S  | S   |
| <i>S.epidermidis</i> | 2  | M      | 26  | eye swap              | ICU               | S  | S   | S   |        | S   |     | S | S  | S   | S   | S   | S   | S  | S  | R | R   | S   | S   | S   | S   | S   | S  |     |
| <i>S.epidermidis</i> | 3  | F      |     | AE,blood              | FSW               | S  | S   | S   |        | S   |     | R | S  | S   | S   | S   | S   | S  | S  | R | R   | S   | S   | S   | S   | S   | S  | S   |
| <i>S.epidermidis</i> | 4  | F      | 62  | BLOOD                 | FMW               | R  | R   | R   |        | R   |     | R | R  | R   | S   | S   | S   | S  | R  | R | R   | S   | R   | S   | R   | S   | S  | S   |
| <i>S.epidermidis</i> | 5  | M      | 59  | BLOOD                 | MSW               | S  | R   | R   |        | R   |     | R | R  | R   | S   | R   | S   | S  | R  | R | R   | S   | R   | S   | R   | S   | S  | S   |
| <i>S.epidermidis</i> | 6  | F      | 66  | BLOOD                 | ICU               | S  | S   | S   |        | S   |     | R | S  | S   | S   |     | R   | S  | S  | R | R   | S   | S   | S   | S   | S   | S  | S   |
| <i>S.epidermidis</i> | 7  | M      | 71  | BLOOD                 | ICU               | S  | S   | S   |        | S   |     | R | R  | S   | S   | S   | S   | S  | S  | R | R   | S   | S   | S   | R   | S   | S  | S   |
| <i>S.epidermidis</i> | 8  | M      | 53  | BLOOD                 | ICU               | S  | S   | S   |        | S   |     | R | R  | S   | S   | R   | S   | S  | R  | R | R   | S   | S   | S   | R   | R   | S  | S   |
| <i>S.epidermidis</i> | 9  | F      | 21  | BLOOD                 | ER, ICU           | S  | S   | S   |        | S   |     | R | R  | S   | S   | R   | S   | S  | S  | S | R   | S   | S   | S   | S   | S   | S  | R   |
| <i>S.epidermidis</i> | 10 | M      | 63  | BLOOD                 | AKU               | R  | S   | S   |        | S   |     | R | R  | S   | S   | S   | S   | S  | S  | R | R   | S   | S   | S   | R   | S   | S  | S   |
| <i>S.epidermidis</i> | 11 | F      | 9   | BLOOD                 | PW                | R  | R   | R   |        | R   |     | R | R  | R   | S   | R   | S   | S  | R  | R | R   | S   | S   | S   | R   | S   | S  | S   |
| <i>S.epidermidis</i> | 12 | M      | 57  | AE blood              |                   | S  | R   | R   |        | R   |     | R | R  | R   | S   | S   | S   | S  | R  | R | R   | S   | S   | S   | S   | S   | S  | S   |
| <i>S.epidermidis</i> | 13 | M      | 70  |                       |                   | R  | R   | R   |        | R   |     | R | R  | R   | S   | S   | S   | S  | S  | R | R   | S   | S   | S   | R   | S   | S  | S   |
| <i>S.epidermidis</i> | 14 | M      | 52  | VITRIOUS FLUID        | ER,ICU            | S  | S   | S   |        | S   |     |   | S  | S   | S   | S   | S   | S  | S  | S | R   | S   | S   | S   | S   | S   | S  | S   |
| <i>S.epidermidis</i> | 15 | M      | 75  | PUS                   | AMR               | S  | S   | S   |        | S   |     |   | S  | S   | S   | S   | S   | S  | S  | R | R   | S   | S   | S   | S   | S   | S  | R   |
| <i>S.epidermidis</i> | 16 | F      | 1   | BLOOD                 | PICU              | S  | R   | R   |        | R   |     | R | R  | R   | S   | S   | S   | S  | R  | R | R   | S   | R   | S   | R   | S   | S  | S   |
| <i>S.epidermidis</i> | 17 | M      | 43  | BLOOD                 | ICU               | S  | S   | S   |        | S   |     | S | S  | S   | S   | S   | S   | S  | S  | R | R   | S   | S   | S   | S   | S   | S  | S   |
| <i>S.epidermidis</i> | 18 | M      | 41  | BLOOD                 | ER                | S  | S   | S   |        | S   |     | R | R  | S   | S   | S   |     | S  | S  | R | R   | S   | S   | S   | S   | S   | S  | S   |
| <i>S.epidermidis</i> | 19 | M      | 89  | BLOOD                 | MMW               | S  | R   | R   |        | R   |     | R | R  | R   | S   | R   |     | S  | S  | R | R   | S   | S   | S   | R   | R   | S  | S   |
| <i>S.epidermidis</i> | 20 | M      | 77  | AE/ANbl               | ICU               | R  | S   | S   |        | S   |     | R | R  | S   | S   | S   | S   | S  | S  | R | R   | S   | S   | S   | R   | S   | S  | R   |
| <i>S.epidermidis</i> | 21 | F      | 63  | BLOOD                 | FMW               | S  | S   | X   |        | S   | X   | R | R  | S   | S   | S   | S   | S  | S  | R | R   | S   | S   | S   | R   | R   | S  | S   |
| <i>S.epidermidis</i> | 22 | F      | 75  | BLOOD                 | ICU               | S  | S   | S   |        | S   | X   | S | S  | S   | S   | S   | S   | S  | S  | S | S   | S   | S   | S   | S   | S   | S  | S   |
| <i>S.epidermidis</i> | 23 | M      | 63  | BLOOD                 | ICU               | S  | S   | S   |        | S   | X   | R | S  | S   | S   | S   | S   | S  | S  | S | R   | S   | S   | S   | S   | S   | S  | S   |
| <i>S.epidermidis</i> | 24 | F      | 80  | BLOOD                 | FMW               | S  | S   | S   |        | S   |     | R | S  | S   | S   | S   | S   | S  | S  | R | I   | S   | S   | S   | S   | S   | S  | S   |
| <i>S.epidermidis</i> | 25 | F      | 48  | PERITONEAL            | AMR               | R  | S   | S   |        | S   |     | S | R  | S   | S   | R   | S   | S  | S  | R | S   | S   | S   | S   | R   | I   | S  | R   |
| <i>S.epidermidis</i> | 26 | F      | 19  | BLOOD                 |                   | S  | S   | I   |        | S   |     | R | S  | S   | S   | R   | S   | S  | S  | R | I   | S   | S   | S   | S   | S   | S  | S   |
| <i>S.epidermidis</i> | 16 | M      | 53  |                       | SLD               | S  | S   | S   |        | S   | X   | R | R  | S   | S   | S   | S   | S  | S  | R | R   | S   | S   | S   | S   | S   | S  | S   |
| <i>S.epidermidis</i> | 17 | F      | 77  | AV                    |                   | S  | S   | S   |        | S   | X   | S | S  | S   | S   | R   | I   | S  | R  | R | R   | S   | R   | S   | R   | R   | S  | S   |
| <i>S.epidermidis</i> | 18 | F      | 87  | BLOOD                 | ICU               | S  | R   | R   |        | R   | X   | R | R  | R   | S   | R   | S   | S  | R  | R | R   | R   | R   | S   | R   | S   | S  | S   |

**Footnote:** <sup>a</sup>specimen color code: red = blood, <sup>b</sup>Ward color code: blue = Female and male medical and surgical, and emergency wards (FMW, FSW, MMW, MSW)

**Table S3.** Specimen sources and type, patient demographics and antibiogram patterns of *E.faecalis* isolates recovered from clinical specimens in major Ha'il Hospitals, against 21 antimicrobials.

| Isolate           | No | Gender | Age | SPECIMEN SITE | Ward | CN | IMI | FOX Screen | CTX | AMP | P | OX | AMC | DAP | SXT | TEC | VA | CD | E | FUS | LNZ | MUP | NIT | CIP | MXF | TET |
|-------------------|----|--------|-----|---------------|------|----|-----|------------|-----|-----|---|----|-----|-----|-----|-----|----|----|---|-----|-----|-----|-----|-----|-----|-----|
| <i>E.faecalis</i> | 1  | M      | 9   | Urine         | PICU | I  | S   | R          | R   | S   | R | R  | S   | S   | S   | S   | S  | R  | R | R   | S   | S   | S   | S   | S   | R   |
| <i>E.faecalis</i> | 2  | M      | 86  | Urine         | ER   | R  | S   | R          | R   | S   | R | R  | S   | S   | R   | S   | S  | R  | R | R   | S   | S   | S   | R   | R   | R   |
| <i>E.faecalis</i> | 3  | M      | 43  | Wound         | ER   | R  | S   | R          | R   | S   | R | R  | S   | S   | S   | S   | S  | R  | S | S   | S   | S   | S   | S   | S   | R   |
| <i>E.faecalis</i> | 4  | M      | 76  | BLOOD         | ER   | S  | S   | R          | R   | S   | R | R  | S   | S   | S   | S   | S  | R  | R | S   | S   | S   | S   | S   | S   | S   |
| <i>E.faecalis</i> | 5  | M      | 71  | BLOOD         | MMW  | R  | R   | R          | R   | S   | R | R  | S   | S   | R   | S   | S  | R  | R | R   | S   | S   | S   | R   | R   | R   |
| <i>E.faecalis</i> | 6  | F      | 68  | BLOOD         | ICU  | S  | S   | R          | R   | S   | R | R  | S   | S   | S   | S   | S  | R  | R | R   | S   | S   | S   | I   | S   | R   |
| <i>E.faecalis</i> | 7  | M      |     | BLOOD         | ICU  | R  | S   | R          | R   | S   | R | R  | S   | S   | R   | S   | S  | R  | R | R   | S   | S   | S   | R   | R   | R   |
| <i>E.faecalis</i> | 8  | F      | 79  | BLOOD         | ICU  | R  | R   | R          | R   | R   | R | R  | R   | R   | S   | S   | S  | R  | R | S   | S   | S   | R   | R   | R   | R   |
| <i>E.faecalis</i> | 9  | M      |     | BLOOD         | PICU | S  | S   | R          | R   | S   | R | R  | S   | S   | S   | S   | S  | S  | S | S   | S   | S   | S   | S   | S   | R   |
| <i>E.faecalis</i> | 10 | M      | 80  | Urine         | ER   | R  | S   | R          | R   | R   | R | R  | R   | R   | R   | R   | R  | R  | R | R   | R   | R   | R   | R   | R   | R   |
| <i>E.faecalis</i> | 11 | F      |     | AN-AE         | FMW  | R  | S   | R          | R   | S   | R | R  | S   | S   | R   | S   | S  | R  | R | S   | S   | S   | S   | R   | R   | R   |
| <i>E.faecalis</i> | 12 | M      | 44  | WOUND         | MSW  | R  | S   | R          | R   | S   | R | R  | S   | S   | S   | S   | S  | R  | R | S   | S   | S   | S   | S   | S   | R   |
| <i>E.faecalis</i> | 13 | M      | 60  | BLOOD         | ICU  | R  | S   | R          | R   | S   | R | R  | S   | S   | R   | S   | S  | R  | R | R   | S   | S   | S   | R   | R   | R   |
| <i>E.faecalis</i> | 14 | M      | 58  | Urine         |      | R  | S   | R          | R   | S   | R | R  | S   | S   | R   | S   | S  | R  | R | R   | S   | S   | S   | R   | R   | R   |
| <i>E.faecalis</i> | 15 | F      | 64  | AN-AE         | FMW  | R  | S   | R          | R   | S   | R | R  | S   | S   | R   | S   | S  | R  | R | S   | S   | S   | S   | R   | R   | R   |
| <i>E.faecalis</i> | 16 | M      | 78  | Urine         | MMW  | R  | R   | R          | R   | S   | R | R  | S   | S   | R   | S   | S  | R  | R | S   | S   | S   | R   | R   | R   | R   |
| <i>E.faecalis</i> | 17 | M      | 78  | Urine         | MMW  | R  | R   | R          | R   | S   | R | R  | S   | S   | R   | S   | S  | R  | R | I   | S   | S   | S   | R   | R   | R   |
| <i>E.faecalis</i> | 18 | M      | 58  | BLOOD         | MMW  | R  | R   | R          | R   | S   | R | R  | S   | S   | R   | S   | S  | R  | R | R   | S   | S   | S   | R   | R   | R   |
| <i>E.faecalis</i> | 19 | M      | 35  | Urine         | ICU  | R  | S   | R          | R   | S   | R | R  | S   | S   | R   | S   | S  | R  | R | S   | S   | S   | S   | R   | R   | R   |
| <i>E.faecalis</i> | 20 | F      | 66  | BLOOD         | ICU  | S  | S   | R          | R   | S   | R | R  | S   | S   | S   | S   | S  | R  | R | S   | S   | S   | S   | S   | S   | R   |
| <i>E.faecalis</i> | 21 | F      | 71  | Urine         | COW  | R  | S   | R          | R   | S   | X | R  | S   | S   | S   | S   | S  | R  | R | R   | S   | S   | S   | X   | R   | R   |
| <i>E.faecalis</i> | 22 | F      | 87  | BLOOD         |      | S  | S   | R          | R   | S   | R | R  | S   | S   | S   | S   | S  | R  | R | R   | S   | S   | S   | S   | S   | S   |
| <i>E.faecalis</i> | 23 | M      | 71  | BLOOD         | ICU  | R  | S   | R          | R   | S   | R | R  | S   | S   | R   | S   | S  | R  | R | S   | S   | S   | S   | R   | R   | R   |
| <i>E.faecalis</i> | 24 | F      | 71  | BLOOD         | ICU  | R  | S   | R          | R   | S   | R | R  | S   | S   | R   | S   | S  | R  | R | R   | S   | S   | S   | R   | R   | R   |
| <i>E.faecalis</i> | 25 | F      | 81  | Urine         |      | R  | S   | R          | R   | S   | R | R  | S   | S   | S   | S   | S  | R  | I | R   | S   | S   | S   | R   | R   | R   |

SpeciSSpecimen color code: red = blood, yellow = urine. Female and male medical and surgical, and emergency wards (FMW, MMW, FSW, , MSW, ER)

**Table S4.** Specimen sources and type, patient demographics and antibiogram patterns of “*Other Gram positive bacteria*” isolates, recovered from clinical specimens in major Ha’il Hospitals, against 21 antimicrobials.

| Isolate                 | No | Gender | Age | Specimen | Ward | CN | IMI | FOX | CTX | AMP | P | OX | AMC | DAP | SXT | TEC | VA | CD | E | FUS | LNZ | MUP | NITC | CIP | MX | TET |
|-------------------------|----|--------|-----|----------|------|----|-----|-----|-----|-----|---|----|-----|-----|-----|-----|----|----|---|-----|-----|-----|------|-----|----|-----|
| <i>E. Facium</i>        | 1  | M      | 94  | Urine    | ER   | R  | R   | R   | R   | R   | R | R  | R   | S   | S   | S   | S  | R  | R | R   | S   | S   | S    | R   | R  | R   |
| <i>E. Facium</i>        | 2  | F      | 73  | Blood    | FMW  | R  | R   | R   | R   | R   | R | R  | R   | S   | S   | S   | S  | R  | R | R   | S   | S   | R    | R   | S  | R   |
| <i>E. Facium</i>        | 3  | F      | 86  | Urine    | ICU  | R  | S   | R   | R   | S   | R | R  | S   | S   | S   | S   | S  | R  | R | R   | S   | S   | S    | R   | R  | R   |
| <i>E. Facium</i>        | 4  | F      | 73  | blood    | AMR  | R  | R   | R   | R   | R   | R | R  | R   | S   | S   | S   | S  | R  | R | I   | S   | S   | S    | R   | R  | R   |
| <i>E. Facium</i>        | 5  | M      | 65  | Urine    |      | S  | R   | R   | S   | S   | R | R  | S   | S   | S   | S   | S  | R  | R | S   | S   | S   | R    | S   | S  | R   |
| <i>E. Facium</i>        | 6  | F      | 50  | Blood    | AMR  | S  | S   | R   | S   | S   | R | R  | S   | S   | S   | S   | S  | S  | S | S   | S   | S   | R    | S   | S  | S   |
| <i>S. acidominimus*</i> | 7  | M      | 51  | blood    | PW   | S  | S   | R   | S   | R   | R | S  |     | S   | S   | S   | R  | S  | R | R   | S   | S   | S    | R   | S  | R   |
| <i>S.agalactiae*</i>    | 8  | F      | 63  | wound    | ER   |    |     | R   | R   | S   | S | S  |     | S   |     | S   | S  |    | S |     |     |     |      |     |    | S   |
| <i>S.agalactiae</i>     | 9  | F      |     | wound    | ER   |    |     |     |     |     |   |    |     |     |     | R   | S  |    |   | S   |     | S   |      |     |    | R   |
| <i>S.agalactiae</i>     | 10 | F      |     |          | FMW  |    |     | S   | S   | S   | S | S  |     |     |     | R   |    |    | S | S   |     |     |      |     |    |     |
| <i>S.agalactiae</i>     | 11 | F      | 54  | Wound    | FSW  |    |     | S   | S   | S   | S | S  |     | S   |     | S   | S  |    | S | S   |     | S   |      |     |    | S   |

\*were also tested sensitive to telithromycin, pristinamycin, and levofloxacin but was resistant to chloramphenicol Female medical and surgical, and emergency wards (FMW, FSW, ER), PW (Pediatic ward). AMR (Arkaptonurea Male Room)
